# Supplementary material
Source: publisher figshare collection journal article supplement (https://acs.figshare.com/ndownloader/files/4530109)
Supplement: Supplementary file 1 [file 4530109]

Supporting Information for

**Diameter Selective Band Structure Modification of  
Single-Walled Carbon Nanotubes by Encapsulated  
Phosphorus Chains**

Jiaoxing Xu and Lunhui Guan\*

*State Key Laboratory of Structural Chemistry, Fujian Institute of Research on  
the Structure of Matter, Chinese Academy of Sciences, YangQiao West Road 155#,  
Fuzhou, Fujian 350002, P.R. China*  
Fax: 86-591-8379 2835; Tel: 86-591-8379 2835  
E-mail: [guanlh@fjirsm.ac.cn](mailto:guanlh@fjirsm.ac.cn)

**1. Materials and sample preparation**

The pristine SWNTs samples was synthesized by arc-discharge method using a catalyst with a 1:1 Y/Ni atomic ratio and purified with recently reported method [1]. To introduce the phosphorus into the channel of pristine SWNTs, 80 mg commercial red phosphorus (80 mg) together with 80 mg SWNTs bucky papers was placed in a quartz tube, sealed in a vacuum of  $10^{-3}$  torr and heated at 440 °C for 24 h. The quartz tube was allowed to cool naturally to room-temperature and the resulting SWNTs bucky-papers were removed from the quartz tube in an inert atmosphere and dispersed in CS<sub>2</sub> by sonication to remove the exterior unembedded phosphorus, the mixtures were then filtered and washed with CS<sub>2</sub>, this protocol was repeated for several times. The product was dried naturally and denoted as P@SWNTs.

**2. Characterization methods:** High-resolution electronic microscope (HR-TEM) images of the hybrid nanostructure were observed on a JEM-2010 apparatus with an acceleration voltage of 200 kV and its composition was analysed by electronic dispersive X-ray spectroscopy (EDX). The optical absorption studies were recorded at room temperature on a Perkin-Elmer UV-VIS-NIR spectrometer (Lambda900), samples were ultrasonicated dispersed in N,N-dimethylformamide (DMF) for 1 hour and ultracentrifuged at a speed of 5000 rp/min for 3 min for forming supernatant, the spectrum was collected from upper supernatant. Raman spectroscopy (Renishaw 2000, excited at 785 nm) was employed to probe the

modification of electronic structure and vibrational properties caused by introduction of phosphorus into the core of the pristine SWNTs. X-ray diffraction (XRD) patterns were performed on Rigaku DMAX2500 X-ray diffractometer using a copper target. The differentiated scanned calorimetric (DSC) analysis was carried out on NETZSCH DTA-404PC in a range from 30-600 °C with a heating rate of 10 °C /min in N<sub>2</sub>.

### 3. Supporting data

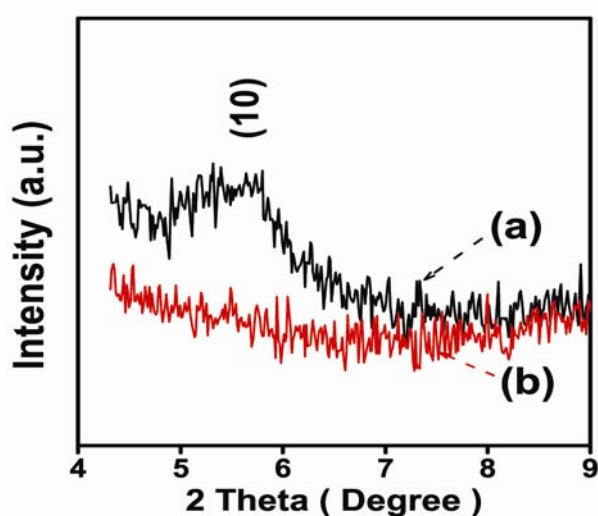

**Figure S1.** Enlarged XRD patterns of (a) the pristine SWNTs and (b) P@SWNTs

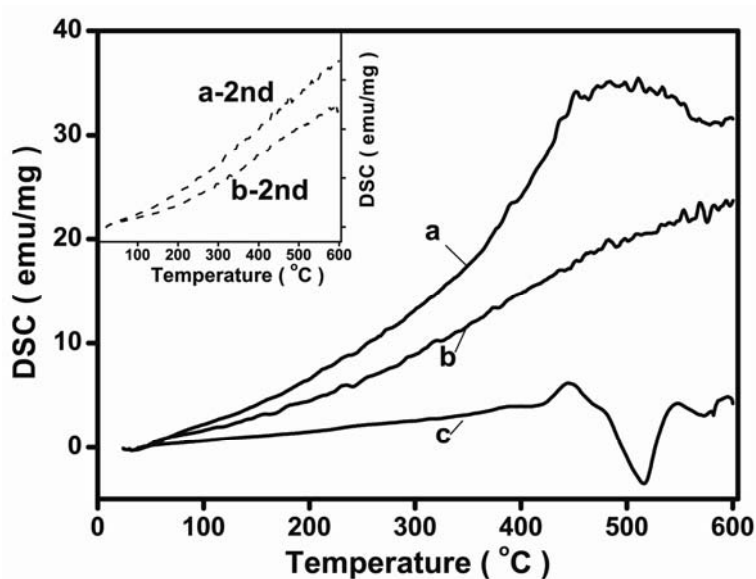

**Figure S2.** DSC curves of (a) P@SWNTs and (b) the pristine SWNTs and (c) commercial red phosphorus for comparisons. The inset showed the repeated DSC

curves of (a, b).

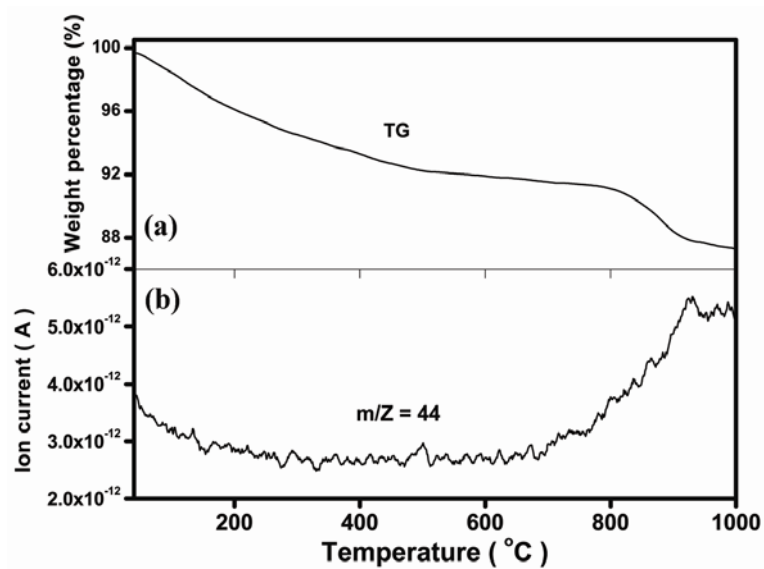

**Figure S3.** (a) TG curve of P@SWNTs in N<sub>2</sub> atmosphere and (b) Mass spectrum of releasing gas ( $m/Z = 44$ ).

#### 4. References

- [1] Wu, C. X.; Li, J. X.; Dong, G. F.; Guan, L. H. *J. Phys. Chem. C* **2009**, 113, 3612.
